# Supplementary material
Source: publisher figshare collection journal article supplement (https://karger.figshare.com/ndownloader/files/35098021)
Supplement: Supplementary file 1 [file 35098021]

## Sheet: Sheet1
	Supplementary data
No.	group	Cases		PFS			OS
				months	censoring*		months	censoring**
1	MST16/VP16	70/M		121	1		121	1
2	MST16/VP16	40/M		24	0		67	0
3	MST16/VP16	46/F		135	1		135	1
4	MST16/VP16	39/F		62	1		62	1
5	MST16/VP16	42/F		43	1		43	1
6	MST16/VP16	77/F		45	1		45	1
7	MST16/VP16	33/M		15	0		22	1
8	MST16/VP16	80/M		6	1		20	1
9	MST16/VP16	80/M		15	1		17	1
1	Control	23/M		36	0		108	0
2	Control	52/M		0	0		21	0
3	Control	55/M		4	0		38	1
4	Control	75/M		24	0		37	0
	*PFS_censoring : 0_progression, 1_progression free
	**OS_censoring : 0_dead, 1_alive
